## Predictors of emergency medical services utilization after different preventive counseling programs in paroxysmal atrial fibrillation patients after catheter ablation

N. Pogossova<sup>1</sup>, Y.M. Yufereva<sup>1</sup>, A.I. Ovchinnikova<sup>2</sup>, O.Y. Sokolova<sup>1</sup>, K.V. Davtyan<sup>3</sup>

<sup>1</sup>National Medical Research Center of Cardiology, Moscow, Russian Federation; <sup>2</sup>Federal State Budgetary Institution "9 Diagnostic and Treatment Center" of the Ministry of Defense, Moscow, Russian Federation; <sup>3</sup>National Center for Preventive Medicine, Moscow, Russian Federation

**Funding Acknowledgement:** Type of funding source: None

**Background:** Catheter ablation (CA) is known to reduce atrial fibrillation (AF) burden, but even after CA patients (pts) may remain symptomatic and seek for emergency care.

**Purpose:** To identify predictors of emergency medical services (EMS) utilization after different preventive counseling programs in paroxysmal AF pts after CA.

**Methods:** This is a secondary analysis of a randomized controlled trial in AF pts after CA (radiofrequency or cryoballoon) assessing the effects of a long-term preventive counseling program encompassing remote support. Pts were randomized into 3 groups in 1:1:1 ratio. During hospitalization for CA pts from all groups received single-session preventive counseling with focus on their individual cardiovascular risk factors profile. After discharge, pts from Group 1 received remote preventive counseling by phone and pts from Group 2 by email every two weeks for the first 3 months after enrollment (a total of 6 sessions). Group 3 received usual care. At baseline and at 12 months of follow-up, pts underwent assessments of their demographic parameters (age, sex, education level, marital status,

and socioeconomic status) and psychological status (stress level using a 10-point visual analogue scale [VAS] and anxiety and depression by the Hospital Anxiety and Depression Scale [HADS]); transthoracic echocardiography, ECG and 24-hour ECG monitoring. A multivariate regression analysis of seeking for EMS was performed with patients' baseline parameters as independent variables.

**Results:** A total of 135 pts aged 35 to 80 years were enrolled (mean age 57.3±9.1 years, 51.8% men). Over 1 year of follow-up, 53 study participants called the ambulance (which made up for 90 calls) with no significant differences between the study groups. Age (odds ratio [OR] 1.8, 95% confidence interval [CI] 1.1–2.9; P=0.010), stress level ≥7 points (OR 3.2, 95% CI 1.4–7.5; P=0.007), left ventricular (LV) ejection fraction ≤62% (OR 2.6, 95% CI 1.1–6.1; P=0.024); and left atrial (LA) diameter ≥42 mm (OR 3.6, 95% CI 1.5–8.5; P=0.003) were independent predictors of an EMS call.

**Conclusions:** Age, perceived stress level, reduced LV function and LA size were independent predictors of EMS utilization after CA regardless of preventive counseling interventions.

|                                                                             | Odds ratio | 95% Confidence interval | p     |
|-----------------------------------------------------------------------------|------------|-------------------------|-------|
| Age groups: 30–39 years, 40–49 years, 50–59 years, 60–69 years, 70–79 years | 1.8        | 1.1–2.9                 | 0.010 |
| Left atrium size (≥42 mm)                                                   | 3.6        | 1.5–8.5                 | 0.003 |
| Left ventricular ejection fraction (≤62%)                                   | 2.6        | 1.1–6.1                 | 0.024 |
| Stress level (≥7 points)                                                    | 3.2        | 1.4–7.5                 | 0.007 |
